# Supplementary material for: A new design of an electrochromic energy storage device with high capacity, long cycle lifetime and multicolor display
Source: Royal Society of Chemistry journal article supplement (doi:10.1039/d0ta04824k), 2020-01-01
Supplement: d0ta04824k1.pdf [file d0ta04824k1.pdf]

## Supporting Information

### A new design of electrochromic energy storage device with high capacity, long cycle lifetime and multicolor display

Ling Wang, Mingrui Guo, Jing Zhan, Xiuling Jiao, Dairong Chen\* and Ting Wang\*

School of Chemistry & Chemical Engineering, National Engineering Research Center for Colloidal Materials, Shandong University

E-mail: [t54wang@sdu.edu.cn](mailto:t54wang@sdu.edu.cn); [cdr@sdu.edu.cn](mailto:cdr@sdu.edu.cn)

#### 1. Materials

Lithium perchlorate ( $\text{LiClO}_4$ , ACS reagent,  $\geq 95.0\%$ ), aluminum perchlorate ( $\text{Al}(\text{ClO}_4)_3$ , 98 %) and poly(3,4-ethylenedioxythiophene)-poly(styrenesulfonate)(PEDOT:PSS) were purchased from Sigma-Aldrich. Tungsten hexachloride ( $\text{WCl}_6$ , 99.5 %), ethanol ( $\text{CH}_3\text{CH}_2\text{OH}$ ), acetic acid ( $\text{CH}_3\text{COOH}$ ) and isopropanol ( $\text{C}_3\text{H}_7\text{OH}$ ) were purchased from Sinopharm Chemical Reagent Co. Ltd.. Titanium isopropoxide ( $\text{Ti}(\text{OC}_3\text{H}_7)_4$ , 99 %), vanadium triisopropoxide ( $\text{VO}(\text{OC}_3\text{H}_7)_3$ , 96 %), propylene carbonate (PC, 99.7 %) and aluminum foil (Al, 99.9 %) were purchased from Aladdin Shanghai Aladdin Biochemical Technology Co. Ltd.. All the reagents are of analytical grade and used as-received without further purification. ITO glasses were purchased from Foshan yuanjingmei Glass Co. Ltd..

#### 2. Film synthesis

**$\text{WO}_3$  films:** In a typical synthesis<sup>S1</sup>, 0.5 g  $\text{WCl}_6$  was dissolved in 5 mL anhydrous ethanol. 200  $\mu\text{L}$  PEDOT: PSS was added into the solution upon sonication for 5 min. As-obtained precursor solution was then spin coated on ITO glass at 2500 rpm (Laurell model WS-650MZ-23NPP-Lite). The resultant films were subjected to UV (PSD Pro Series Digital UV Ozone System;  $I_{\text{max}}$  at 185 nm and 254 nm) irradiation for 5 min. As-obtained films were annealed in an oven (JMD-FB) in air at 110 °C for 1 hour.

**Ti-doped  $\text{V}_2\text{O}_5$  films:** The Ti-doped  $\text{V}_2\text{O}_5$  films were prepared by controlling the hydrolytic polycondensation of the vanadium triisopropoxide and titanium isopropoxide precursors. In a typical synthesis<sup>S2</sup>,  $\text{VO}(\text{OC}_3\text{H}_7)_3$  and  $\text{Ti}(\text{OC}_3\text{H}_7)_4$  were dissolved in isopropanol separately, then 5 mL  $\text{Ti}(\text{OC}_3\text{H}_7)_4$ /isopropanol solution (0.14 M) was added into 10 mL  $\text{VO}(\text{OC}_3\text{H}_7)_3$ /isopropanol solution (0.14 M) upon continuous stirring. 300  $\mu\text{L}$  acetic acid was added dropwise to tuning the hydrolytic condensation process. Within an hour, a clear and stable yellow solution can be obtained. 200  $\mu\text{L}$  PEDOT: PSS were further added into the solution upon sonication. As-obtained precursor solution was then spin coated on ITO glass at 2500 rpm. As-obtained films were annealed in oven at 280 °C for 50 minutes.

### 3. Materials characterization

X-ray photoelectron spectroscopy (XPS) analyses were carried out on a Perkin-Elmer PHI-5300 ESCA system spectrometer with Al K $\alpha$  radiation. The pass energy was 192 eV for the survey scan and 48 eV for the narrow scan. Powder X-ray diffraction (XRD) patterns were collected on a Rigaku D/Max 2200PC diffractometer with a graphite monochromator and Cu K $\alpha$  radiation ( $\lambda = 0.15418$  nm). The scanning electron microscopy (SEM, SU8010) images were collected to analyze the morphology and elemental distribution of the samples. Cross-sectional SEM images were performed on films deposited by above method about 400 nm and 600 nm of WO<sub>3</sub> and Ti-doped V<sub>2</sub>O<sub>5</sub> films on a glass substrate.

### 4. Electrochemical and electrochromic measurements

All the electrochemical and electrochromic measurements of the WO<sub>3</sub> and Ti-doped V<sub>2</sub>O<sub>5</sub> films were carried out on Cary series UV-visible spectrophotometer (Cary 100, Agilent technologies) and electrochemical analyzer (CHI-660E; CH Instruments, Shanghai, China) in a three-electrode spectroelectrochemical cell, using the WO<sub>3</sub> film or Ti-doped V<sub>2</sub>O<sub>5</sub> film as the working electrode, an Al foil working as the counter electrode and an Ag/AgCl working as the reference electrode, respectively. The galvanostatic charge/discharge (GCD) measurements were performed in a potential window to obtain the areal capacity of WO<sub>3</sub> and Ti-doped V<sub>2</sub>O<sub>5</sub> cathode in a three-electrode cell with a piece of Al foil as the counter electrode and Ag/AgCl as the reference electrode, using the CHI-660E, in different electrolytes (1M LiClO<sub>4</sub>/PC, 1M Al(ClO<sub>4</sub>)<sub>3</sub>/PC and mixed LiClO<sub>4</sub>/Al(ClO<sub>4</sub>)<sub>3</sub>/PC, the proportion of Li<sup>+</sup> and Al<sup>3+</sup> in the hybrid electrolyte was adjusted to 80:20). The cycle stability were performed at a current density of 0.5 mA/cm<sup>2</sup> in the potential window of -1.5~1.0 V (*vs* Ag<sup>+</sup>/Ag) for WO<sub>3</sub> and -1.2~2.0 V (*vs* Ag<sup>+</sup>/Ag) for Ti-doped V<sub>2</sub>O<sub>5</sub> in 1M LiClO<sub>4</sub>/Al(ClO<sub>4</sub>)<sub>3</sub>/PC electrolyte. In-situ optical transmittance as a function of the applied potential were obtained in a quartz cell recorded by the UV-visible spectrophotometer. The applied potentials were -1 V and 1 V for WO<sub>3</sub>, -1.5 V and 2 V for Ti-doped V<sub>2</sub>O<sub>5</sub>, respectively. And the measurements of the transmittance at specified wavelengths (780 nm for WO<sub>3</sub> and 400 nm for Ti-doped V<sub>2</sub>O<sub>5</sub>) in real time were performed by the UV-visible spectrophotometer. The transmittance of the ITO glass in the electrolyte was used as the baseline. The cyclic voltammetry (CV) testing of deposited WO<sub>3</sub> and Ti-doped V<sub>2</sub>O<sub>5</sub> electrode was performed in a three-electrode cell with a piece of Al foil as counter electrode and Ag/AgCl as reference electrode, using the CHI-660E, in the electrolytes of 1M LiClO<sub>4</sub>/PC electrolyte. The electrochemical cyclic voltammetry cycle stability was measured at 50 mV s<sup>-1</sup> in 1 M LiClO<sub>4</sub>/PC electrolyte. Electrochemical impedance spectroscopy (EIS) was obtained by CHI-660E over a frequency range from 100 KHz to 0.1 Hz, with an AC amplitude of 10 mV in 1 M LiClO<sub>4</sub>/PC

electrolyte.

The diffusion coefficients  $D$  ( $\text{cm}^2/\text{s}$ ) of  $\text{Al}^{3+}$  and  $\text{Li}^+$  in the  $\text{WO}_3$  and Ti-doped  $\text{V}_2\text{O}_5$  were calculated by Randles-Sevcik equation:

$$I_p = kn^{3/2}AD^{1/2}cv^{1/2} \text{ (Equation S1)}$$

where  $I_p$  (A) is the peak current,  $k$  is the Randles-Sevcik constant,  $k = 2.69 \times 10^5$ ,  $n$  is the transferred electron number involved in the redox process,  $A$  ( $\text{cm}^2$ ) is the area of the electrode,  $C$  ( $\text{mol}/\text{cm}^3$ ) is the concentration of  $\text{Al}^{3+}$  or  $\text{Li}^+$  in the bulk solution, and  $v$  ( $\text{V s}^{-1}$ ) is the scan rate.

Li-ion diffusion coefficients:

$$\begin{aligned} D_{(\text{WO}_3)} &= \left( \frac{I_p}{v^{1/2}} * \frac{1}{k * n^{3/2} * A * C} \right)^2 & D_{(\text{Ti-V}_5\text{O}_2)} &= \left( \frac{I_p}{v^{1/2}} * \frac{1}{k * n^{3/2} * A * C} \right)^2 \\ &= \left( 0.29 * \frac{1}{2.69 * 10^5 * 1^{3/2} * 0.64 * 1} \right)^2 & &= \left( 0.24 * \frac{1}{2.69 * 10^5 * 1^{3/2} * 1 * 1} \right)^2 \\ &= 2.84 * 10^{-12} & &= 7.96 * 10^{-13} \end{aligned}$$

Al-ion diffusion coefficients:

$$\begin{aligned} D_{(\text{WO}_3)} &= \left( \frac{I_p}{v^{1/2}} * \frac{1}{k * n^{3/2} * A * C} \right)^2 & D_{(\text{Ti-V}_5\text{O}_2)} &= \left( \frac{I_p}{v^{1/2}} * \frac{1}{k * n^{3/2} * A * C} \right)^2 \\ &= \left( 0.11 * \frac{1}{2.69 * 10^5 * 3^{3/2} * 0.49 * 1} \right)^2 & &= \left( 0.12 * \frac{1}{2.69 * 10^5 * 3^{3/2} * 0.96 * 1} \right)^2 \\ &= 2.72 * 10^{-14} & &= 7.99 * 10^{-15} \end{aligned}$$

## 5. Electrochromic energy storage device assembly

Electrochromic energy storage device was assembled using two pieces of ITO glass ( $5 \times 5 \text{ cm}^2$ ) with  $\text{WO}_3$  and  $\text{Ti-V}_2\text{O}_5$  deposited on them, respectively. The Al metal frame was used as the anode, and propylene carbonate (PC) containing  $\text{LiClO}_4$  (0.8 M) /  $\text{Al}(\text{ClO}_4)_3$  (0.2 M) were used as the electrolyte. First, the two ITO electrodes and the Al metal frame (in the middle of the two ITO electrodes) were assembled as a cell. Epoxy glue was used to seal three sides of the cell. The electrolyte was injected into the cell by a syringe through the unsealed side of the cell. Before injection, the empty cell and the electrolyte in a vial were purged with dry  $\text{N}_2$  for 15 min to drive away ambient air. The assembled device had an active area of  $20.25 \text{ cm}^2$ .

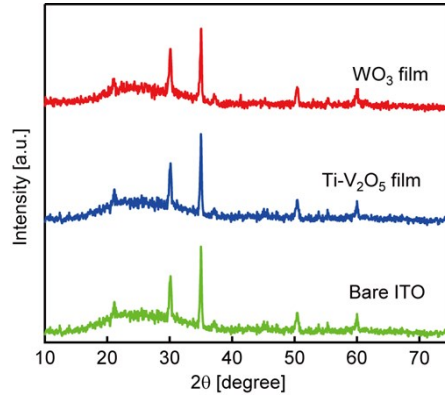

**Figure S1.** XRD patterns of as-prepared  $\text{WO}_3$  and  $\text{Ti-V}_2\text{O}_5$  films.

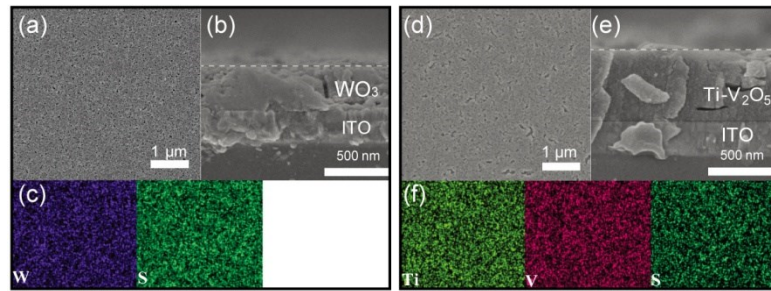

**Figure S2.** (a-c) SEM, cross-section SEM and the EDS elemental mappings results for the  $\text{WO}_3$  film. (d-f) SEM, cross-section SEM and the EDS elemental mappings results for the  $\text{Ti-V}_2\text{O}_5$  film.

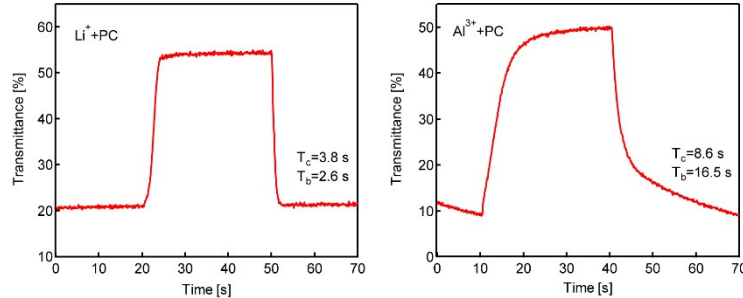

**Figure S3.** Real-time transmittance spectra for the  $\text{Ti-V}_2\text{O}_5$  film in pure Li-ion and Al-ion electrolyte monitored at 400 nm.

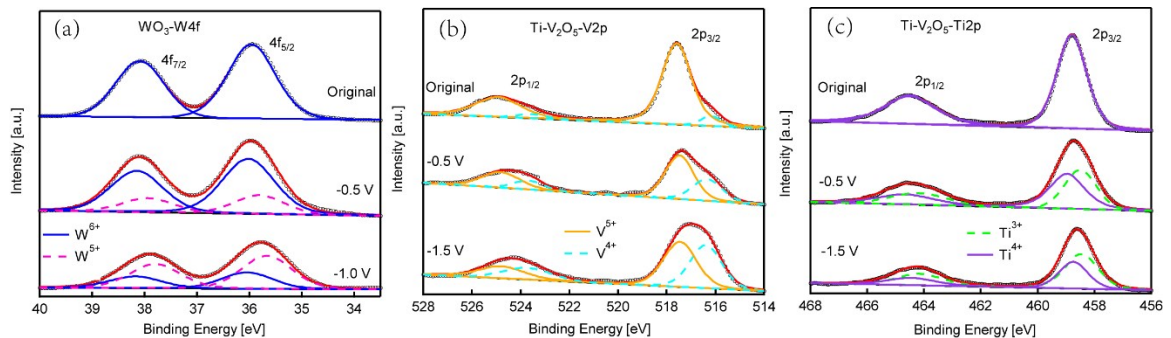

**Figure S4.** The ex-situ X-ray photoemission spectroscopy (XPS) spectra of the  $\text{WO}_3$  film and the  $\text{Ti-V}_2\text{O}_5$  film under different applied potentials. (a) The W 4f signals in the  $\text{WO}_3$  film. (b) The V 2p signals in the  $\text{Ti-V}_2\text{O}_5$  film. (c) The Ti 2p signals in the  $\text{Ti-V}_2\text{O}_5$  film.

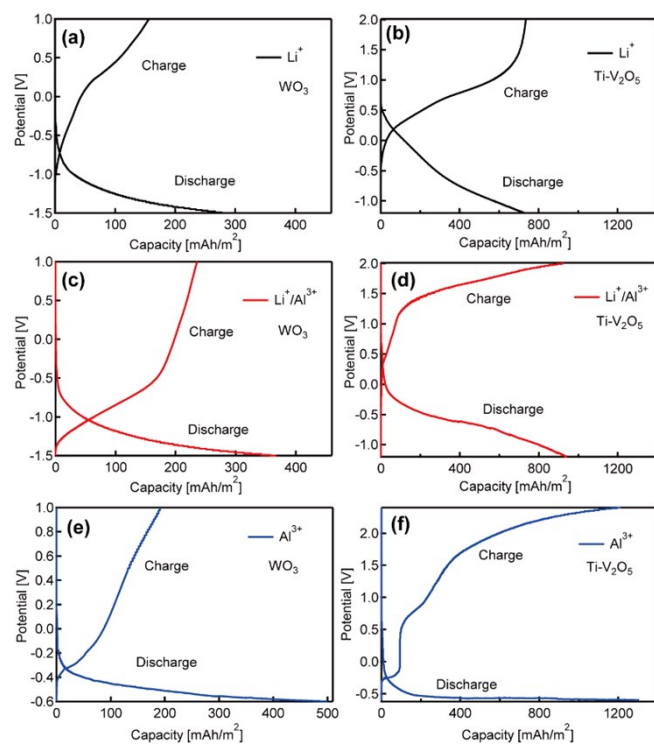

**Figure S5.** The first GCD profiles of the  $\text{WO}_3$  and the  $\text{Ti-V}_2\text{O}_5$  films in (a, b) single  $\text{Li}$ -ion electrolyte, (c, d) the mixed  $\text{Li}/\text{Al}$ -ion electrolyte and (e, f)  $\text{Al}$ -ion electrolyte at  $0.5 \text{ mA}/\text{cm}^2$ .

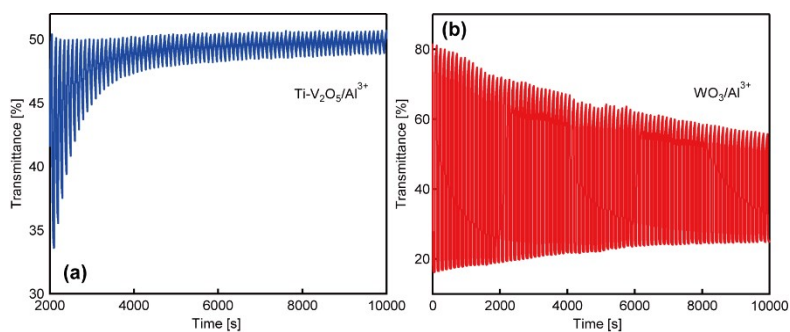

**Figure S6.** The cycle stability by monitoring the transmittance changes (a) at  $780 \text{ nm}$  for the  $\text{WO}_3$  film and (b)  $400 \text{ nm}$  for the  $\text{Ti-V}_2\text{O}_5$  film in the single  $\text{Al}$ -ion electrolyte.

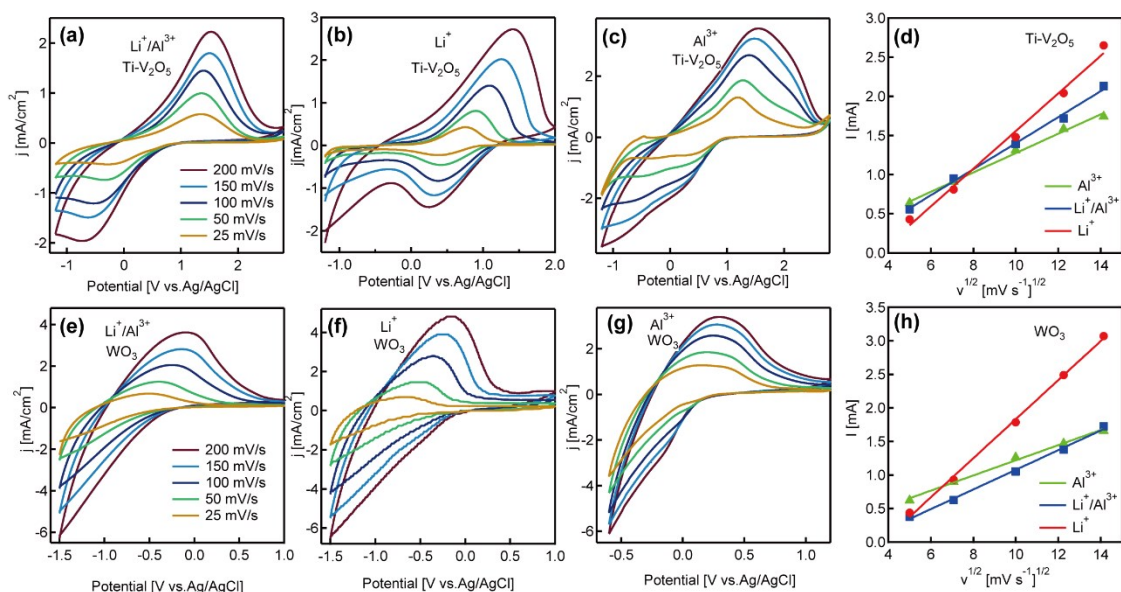

**Figure S7.** Cyclic voltammograms of the Ti-V<sub>2</sub>O<sub>5</sub> film in (a) Li/Al-ion electrolyte, (b) Li-ion electrolyte and (c) Al-ion electrolyte at various scan rates. Cyclic voltammograms of the WO<sub>3</sub> film in (e) Li/Al-ion electrolyte, (f) Li-ion electrolyte and (g) Al-ion electrolyte at various scan rates. (d, h) Anodic peak current of the Ti-V<sub>2</sub>O<sub>5</sub> film and the WO<sub>3</sub> film obtained from the cyclic voltammograms in the Li/Al-ion electrolyte, Li-ion electrolyte and Al-ion electrolyte versus the square roots of the scan rates.

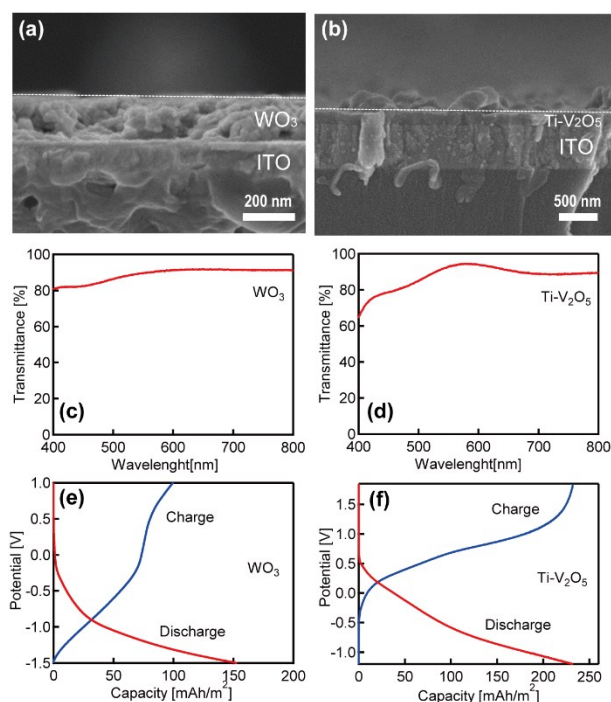

**Figure S8.** (a, b) Cross-section SEM images showing the thickness of the prepared thin WO<sub>3</sub> and Ti-V<sub>2</sub>O<sub>5</sub> films. (c, d) Optical transmittance spectra of as-prepared WO<sub>3</sub> film and the Ti-V<sub>2</sub>O<sub>5</sub> film. (e, f) The first GCD profiles of the WO<sub>3</sub> and the Ti-V<sub>2</sub>O<sub>5</sub> films.

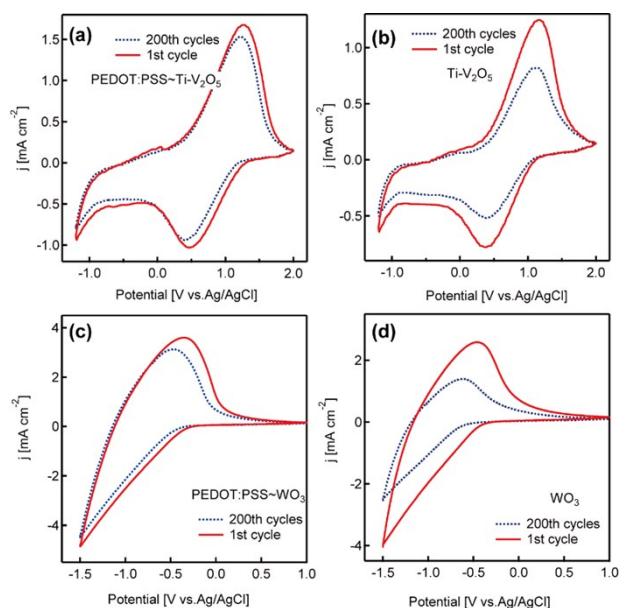

**Figure S9.** The electrochemical cyclic voltammetry curves of (a)  $\text{Ti-V}_2\text{O}_5$  films with PEDOT:PSS, (b)  $\text{Ti-V}_2\text{O}_5$  films without PEDOT:PSS, (c)  $\text{WO}_3$  films with PEDOT:PSS, (d)  $\text{WO}_3$  films without PEDOT:PSS, measured at  $50 \text{ mV s}^{-1}$  in  $1 \text{ M LiClO}_4/\text{PC}$  electrolyte.

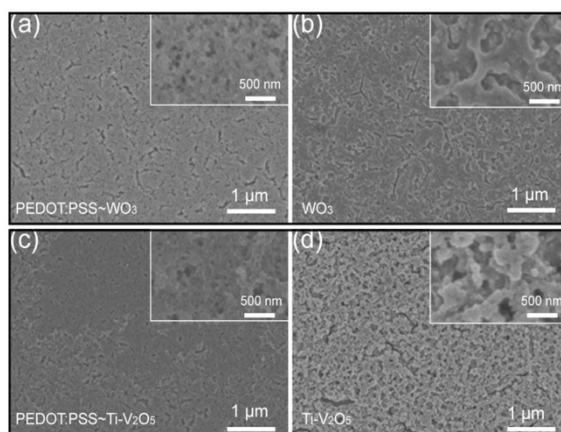

**Figure S10.** The SEM images of (a)  $\text{WO}_3$  films with PEDOT:PSS, (b)  $\text{WO}_3$  films without PEDOT:PSS, (c)  $\text{Ti-V}_2\text{O}_5$  films with PEDOT:PSS, (d)  $\text{Ti-V}_2\text{O}_5$  films without PEDOT:PSS, after 200 continuous cyclic voltammetry cycles.

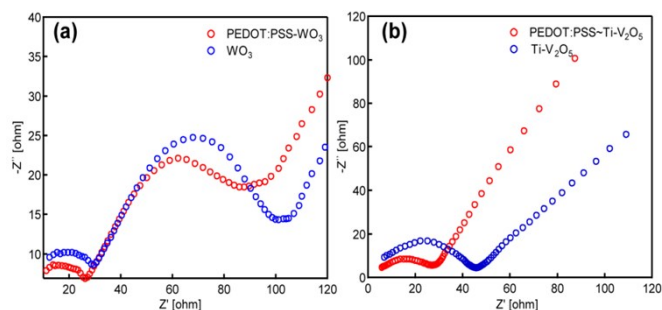

**Figure S11.** The electrochemical impedance spectroscopy of (a)  $\text{WO}_3$  films with PEDOT:PSS and  $\text{WO}_3$  films without PEDOT:PSS, (b)  $\text{Ti-V}_2\text{O}_5$  films with PEDOT:PSS and  $\text{Ti-V}_2\text{O}_5$  films without PEDOT:PSS, measured in  $1 \text{ M LiClO}_4/\text{PC}$  electrolyte.

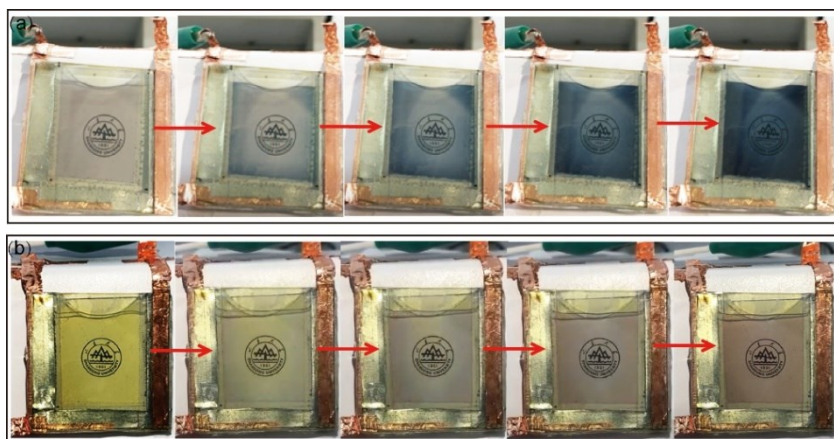

**Figure S12.** Color changes in photos at different times. (a)  $\text{WO}_3$ : transparent to blue, wait 20 seconds for the next photo, (b)  $\text{Ti-V}_2\text{O}_5$ : yellow to red, wait 15 seconds for the next photo.

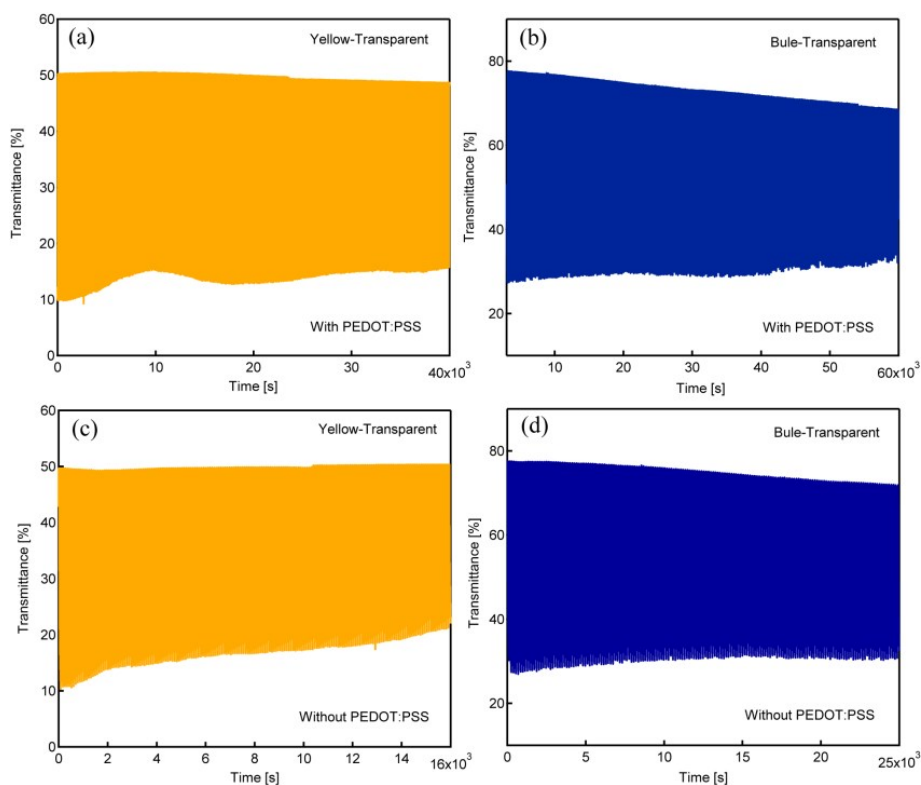

**Figure S13.** The cycle stability by monitoring the transmittance changes (a, c) at 400 nm and (b, d) at 780 nm for as-assembled EES device. (a, b) With PEDOT:PSS for 500 cycles. (c, d) Without PEDOT:PSS for 200 cycles.

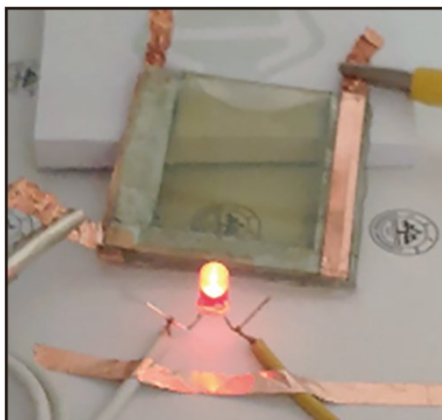



**Figure S14.** The yellow Ti-V<sub>2</sub>O<sub>5</sub> film of the device can light an LED bulb (1.8 V, 0.04W) for 8.5 min.

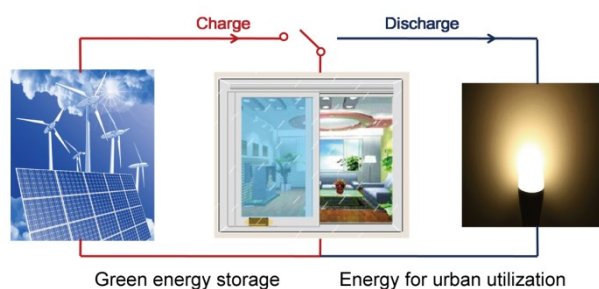

**Figure S15.** The EES device can be used in the storage of green energy, such as energy harvested from solar and wind, and the energy stored can be reused in urban life to reduce the energy demands

**Table S1.** Comparison of Current State-of-the-Art Electrochromic Films and Devices

| Electrode materials                                    | Electrolyte                                                | Capacity                                                                                                                   | OCP(V)                                                                             | Stability of charge capacity                                                                                                              | Ref.      |
|--------------------------------------------------------|------------------------------------------------------------|----------------------------------------------------------------------------------------------------------------------------|------------------------------------------------------------------------------------|-------------------------------------------------------------------------------------------------------------------------------------------|-----------|
| Al/WO <sub>3</sub> /Ti-V <sub>2</sub> O <sub>5</sub>   | LiClO <sub>4</sub> -Al(ClO <sub>4</sub> ) <sub>3</sub> /PC | 933 mAh/m <sup>2</sup> in all:<br>Al-V <sup>a</sup> : 631 mAh/m <sup>2</sup><br>Al-W <sup>a</sup> : 302 mAh/m <sup>2</sup> | Al-V <sup>a</sup> : 3.492<br>Al-W <sup>a</sup> : 2.588<br>W-V <sup>a</sup> : 1.342 | WO <sub>3</sub> film: 1000 cycles (72% capacity retention)<br>Ti-V <sub>2</sub> O <sub>5</sub> film: 1000 cycles (78% capacity retention) | This work |
| PLA <sup>b</sup> -WO <sub>3-x</sub> nanowire (~450 nm) | LiClO <sub>4</sub> /PC                                     | 91 mAh/m <sup>2</sup> (0.132 Wh m <sup>-2</sup> )                                                                          | 2.59                                                                               | 1000 cycles (75% capacity retention)                                                                                                      | S3        |
| Zn-amorphous WO <sub>3</sub> (~300 nm)                 | ZnSO <sub>4</sub> -AlCl <sub>3</sub> aqueous               | 126.3 mAh/m <sup>2</sup>                                                                                                   | 1.15                                                                               | 2500 cycles (70% capacity retention)                                                                                                      | S4        |
| Zn- MTWO nanowire                                      | ZnSO <sub>4</sub> aqueous                                  | 150 mAh/m <sup>2</sup>                                                                                                     | 1.2                                                                                | 100 cycles (53% capacity retention)                                                                                                       | S5        |
| Zn-crystalline V <sub>3</sub> O <sub>7</sub> (~220 nm) | ZnSO <sub>4</sub> aqueous                                  | 15.2 mWh/g                                                                                                                 | 1.38                                                                               | 100 cycles (40% capacity retention)                                                                                                       | S6        |
| Al-W <sub>18</sub> O <sub>49</sub> nanowire            | AlCl <sub>3</sub> aqueous                                  | 429 mAh/g                                                                                                                  | 1.2                                                                                | 3 cycles (capacity loss of 18%)                                                                                                           | S7        |
| Al-Prussian blue (~450 nm)                             | KCl aqueous                                                | 75 mAh/g                                                                                                                   | 1.26                                                                               | 50 cycles (81% capacity retention)                                                                                                        | S8        |

a: Al-W: The Al anode is connected to the WO<sub>3</sub>; Al-V: The Al anode is connected to the Ti-V<sub>2</sub>O<sub>5</sub>; W-V: The WO<sub>3</sub> is connected to the Ti-V<sub>2</sub>O<sub>5</sub>

b: A prelithiated Al anode.

## References

- S1. Moura, E. A., Cholant, C. M., Balboni, R. D. C., Westphal, T. M., Lemos, R. M. J., Azevedo, C. F., & Pawlicka, A., Electrochemical properties of thin films of V<sub>2</sub>O<sub>5</sub> doped with TiO<sub>2</sub>. *Journal of Physics and Chemistry of Solids* **2016**, *119*, 1-8.
- S2. Cheng, W., He, J., Dettelbach, K. E., Johnson, N. J., Sherbo, R. S., & Berlinguette, C. P., Photodeposited amorphous oxide films for electrochromic windows. *Chem* **2018**, *4*(4), 821-832.
- S3. Zhang, S., Cao, S., Zhang, T., Yao, Q., Lin, H., Fisher, A., & Lee, J. Y., Overcoming the technical challenges in Al anode-based electrochromic energy storage windows. *Small Methods* **2020**, *4*(1), 1900545.
- S4. Li, H., Firby, C. J., & Elezzabi, A. Y., Rechargeable aqueous hybrid Zn<sup>2+</sup>/Al<sup>3+</sup> electrochromic batteries. *Joule* **2019**, *3*(9), 2268-2278.
- S5. Li, H., McRae, L., Firby, C. J., & Elezzabi, A. Y., Rechargeable aqueous electrochromic batteries utilizing Ti-substituted tungsten molybdenum oxide based Zn<sup>2+</sup> ion intercalation cathodes. *Advanced Materials* **2019**, *31*(15), 1807065.
- S6. Zhang, W., Li, H., Al-Hussein, M., & Elezzabi, A. Y., Electrochromic battery displays with energy retrieval functions using solution-processable colloidal vanadium oxide nanoparticles. *Advanced Optical Materials*

**2020**, 8(2), 1901224.

S7. Zhao, J., Tian, Y., Wang, Z., Cong, S., Zhou, D., Zhang, Q., & Zhao, Z., Trace H<sub>2</sub>O<sub>2</sub>-assisted high-capacity tungsten oxide electrochromic batteries with ultrafast charging in seconds. *Angewandte Chemie International Edition* **2016**,55(25), 7161-7165.

S8. Wang, J., Zhang, L., Yu, L., Jiao, Z., Xie, H., Lou, X. W. D., & Sun, X. W., A bi-functional device for self-powered electrochromic window and self-rechargeable transparent battery applications. *Nature communications* **2014**,5(1), 1-7.
